# Supplementary material
Source: Springer Nature journal article supplement (https://www.springermedizin.de/resource/supplementary/12906_2012_1421_MOESM1_ESM.pdf/9521876)
Supplement: MOESM1 [file 9521876]

## SNAPSHOT Questionnaire 1

### Consent

By completing this questionnaire, I acknowledge I have read the information provided and any questions I have asked have been answered to my satisfaction. I **agree to participate** in this randomised trial, realising that I may withdraw at any time without reason and without prejudice.

I understand that all information provided is treated as **strictly confidential** and will not be released by the investigator unless required to by law. I have been advised as to what data are being collected, what the purpose is, and what will be done with the data upon completion of the research.

I agree that research data gathered for the study may be published provided my name or other identifying information is not used.

Signed (*Participant*) \_\_\_\_\_

Date \_\_\_\_\_

**Name:** \_\_\_\_\_

**Date of Birth:** (day) \_\_\_\_\_ / (month) \_\_\_\_\_ / 19\_\_\_\_\_

**Gender:** Male / Female

**SolarisCare Centre:**

Sir Charles Gairdner Hospital       St John of God       South West - Bunbury       Albany

**Employment Status:**

Are you currently working? (*Please circle*) YES / NO

What is your current employment status? (Select one)

Casual       Part Time       Full Time       Retired (*since diagnosis? Y / N*)

Sick leave *If so, how long:* \_\_\_\_\_ months

**Cancer Information:**

When were you first diagnosed with cancer? (Month/year) \_\_\_\_\_

Location of cancer: \_\_\_\_\_

Has your cancer spread? YES / NO *If yes, where?* \_\_\_\_\_

**Treatment Received:**

|                                            |   |                                  |                                          |                               |
|--------------------------------------------|---|----------------------------------|------------------------------------------|-------------------------------|
| <input type="checkbox"/> Radiation Therapy | ⇒ | <input type="checkbox"/> Planned | <input type="checkbox"/> Current/Ongoing | <input type="checkbox"/> Past |
| <input type="checkbox"/> Chemotherapy      | ⇒ | <input type="checkbox"/> Planned | <input type="checkbox"/> Current/Ongoing | <input type="checkbox"/> Past |
| <input type="checkbox"/> Cancer Surgery    | ⇒ | <input type="checkbox"/> Planned | <input type="checkbox"/> Current/Ongoing | <input type="checkbox"/> Past |
| <input type="checkbox"/> Hormone Treatment | ⇒ | <input type="checkbox"/> Planned | <input type="checkbox"/> Current/Ongoing | <input type="checkbox"/> Past |
| <input type="checkbox"/> Other: _____      |   |                                  | <input type="checkbox"/> Current/Ongoing | <input type="checkbox"/> Past |

**Other Health Information:** *(Please tick all that apply – remember any daily medications)*

- |                                                                                                                             |                                                              |
|-----------------------------------------------------------------------------------------------------------------------------|--------------------------------------------------------------|
| <input type="checkbox"/> Cardiac condition (i.e. high blood pressure, heart disease)                                        | <input type="checkbox"/> Circulatory Problems                |
| <input type="checkbox"/> Diabetes                                                                                           | <input type="checkbox"/> Epilepsy                            |
| <input type="checkbox"/> Arthritis or joint problems                                                                        | <input type="checkbox"/> Respiratory Problems (incl. Asthma) |
| <input type="checkbox"/> Osteoporosis, osteopenia or bone fracture/s                                                        | <input type="checkbox"/> Digestive Problems                  |
| <input type="checkbox"/> Thrombocytopenia                                                                                   | <input type="checkbox"/> Neutropenia                         |
| <input type="checkbox"/> Persistent or chronic pain                                                                         | <input type="checkbox"/> Depressive or anxiety disorder      |
| <input type="checkbox"/> Neurological condition (i.e. multiple sclerosis, dementia, Parkinson's, Motor Neurone Disease etc) |                                                              |
| <input type="checkbox"/> Other: _____                                                                                       |                                                              |

**Are you seeing any health professionals other than an Oncologist or Haematologist?** *(Please tick all that apply)*

- |                                                       |                                                             |
|-------------------------------------------------------|-------------------------------------------------------------|
| <input type="checkbox"/> Psychologist/Councillor      | <input type="checkbox"/> Dietician/Nutritionist             |
| <input type="checkbox"/> Physiotherapist/Chiropractor | <input type="checkbox"/> Naturopath/Herbalist               |
| <input type="checkbox"/> Support Group/Forum          | <input type="checkbox"/> Yoga/Pilates/Exercise Professional |
| <input type="checkbox"/> Other: _____                 |                                                             |

**Are you taking any supplements or natural remedies?** YES / NO

If yes, are they...  prescribed by a health professional?  self-selected?

Please list supplements or remedies used *(i.e. Multiple vitamin, herbal tonic, vitamin injections)*

---



---

**Since diagnosis how many sessions of complementary therapy have you had?** *(Please tick appropriate)*

- Less than 6 sessions       Between 6 -12       More than 12 sessions

**What services or therapies have you utilised at SolarisCare?** *(Please tick all that apply)*

- |                                             |                                               |                                              |                                            |
|---------------------------------------------|-----------------------------------------------|----------------------------------------------|--------------------------------------------|
| <input type="checkbox"/> Acupuncture        | <input type="checkbox"/> Aromatherapy         | <input type="checkbox"/> Bowen Therapy       | <input type="checkbox"/> Guided Meditation |
| <input type="checkbox"/> Counselling        | <input type="checkbox"/> Creative Art Therapy | <input type="checkbox"/> Healing Touch       | <input type="checkbox"/> Kinesiology       |
| <input type="checkbox"/> Pranic Healing     | <input type="checkbox"/> Qi Gong              | <input type="checkbox"/> Reflexology         | <input type="checkbox"/> Reiki             |
| <input type="checkbox"/> Relaxation Massage | <input type="checkbox"/> Resource Library     | <input type="checkbox"/> Waiting area/lounge |                                            |
| <input type="checkbox"/> Other: _____       |                                               |                                              |                                            |

**PLEASE CONTINUE ON NEXT PAGE...**

### **Schwartz Cancer Fatigue Scale**

The words and phrases describe different feelings people associate with fatigue. Please read each item and **circle the number that indicates how much fatigue has made you feel in the past 2 to 3 days.**

|                     | <b>NOT AT ALL</b> | <b>A LITTLE BIT</b> | <b>MODERATELY</b> | <b>QUITE A BIT</b> | <b>EXTREMELY</b> |
|---------------------|-------------------|---------------------|-------------------|--------------------|------------------|
| Tired               | 1                 | 2                   | 3                 | 4                  | 5                |
| Difficulty thinking | 1                 | 2                   | 3                 | 4                  | 5                |
| Overcome            | 1                 | 2                   | 3                 | 4                  | 5                |
| Listless            | 1                 | 2                   | 3                 | 4                  | 5                |
| Worn out            | 1                 | 2                   | 3                 | 4                  | 5                |
| Helpless            | 1                 | 2                   | 3                 | 4                  | 5                |

**PLEASE CONTINUE ON NEXT PAGE...**

## INTERNATIONAL PHYSICAL ACTIVITY QUESTIONNAIRE

We are interested in finding out about the kinds of physical activities that people do as part of their everyday lives. The questions will ask you about the time you spent being physically active in the **last 7 days**. Please answer each question even if you do not consider yourself to be an active person. Please think about the activities you do at work, as part of your house and yard work, to get from place to place, and in your spare time for recreation, exercise or sport.

Think about all the **vigorous** activities that you did in the **last 7 days**. **Vigorous** physical activities refer to activities that take hard physical effort and make you breathe much harder than normal. Think *only* about those physical activities that you did for at least 10 minutes at a time.

1. During the **last 7 days**, on how many days did you do **vigorous** physical activities like heavy lifting, digging, aerobics, or fast bicycling?

\_\_\_\_\_ **days per week**

No vigorous physical activities → **Skip to question 3**

2. How much time did you usually spend doing **vigorous** physical activities on one of those days?

\_\_\_\_\_ **hours per day**

\_\_\_\_\_ **minutes per day**

Don't know/Not sure

Think about all the **moderate** activities that you did in the **last 7 days**. **Moderate** activities refer to activities that take moderate physical effort and make you breathe somewhat harder than normal. Think *only* about those physical activities that you did for at least 10 minutes at a time.

3. During the **last 7 days**, on how many days did you do **moderate** physical activities like carrying light loads, bicycling at a regular pace, or doubles tennis? Do not include walking.

\_\_\_\_\_ **days per week**

No moderate physical activities → **Skip to question 5**

4. How much time did you usually spend doing **moderate** physical activities on one of those days?

\_\_\_\_\_ **hours per day**

\_\_\_\_\_ **minutes per day**

Don't know/Not sure

Think about the time you spent **walking** in the **last 7 days**. This includes at work and at home, walking to travel from place to place, and any other walking that you might do solely for recreation, sport, exercise, or leisure.

5. During the **last 7 days**, on how many days did you **walk** for at least 10 minutes at a time?

\_\_\_\_\_ **days per week**

No walking → **Skip to question 7**

6. How much time did you usually spend **walking** on one of those days?

\_\_\_\_\_ **hours per day**

\_\_\_\_\_ **minutes per day**

Don't know/Not sure

The last question is about the time you spent **sitting** on weekdays during the **last 7 days**. Include time spent at work, at home, while doing course work and during leisure time. This may include time spent sitting at a desk, visiting friends, reading, or sitting or lying down to watch television.

7. During the **last 7 days**, how much time did you spend **sitting** on a **week day**?

\_\_\_\_\_ **hours per day**

\_\_\_\_\_ **minutes per day**

Don't know/Not sure

**This is the end of the questionnaire bundle one,**

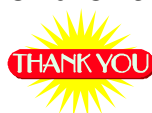

**for participating!!**
